# Supplementary material for: Performance of a microfluidic device for in situ ToF-SIMS analysis of selected organic molecules at aqueous surfaces
Source: Royal Society of Chemistry journal article supplement (doi:10.1039/c3ay26513g), 2013-01-01
Supplement: c3ay26513g.pdf [file c3ay26513g.pdf]

Supplemental Materials

# Performance of a Microfluidic Device for *In Situ* ToF-SIMS Analysis of Selected Organic Molecules at Aqueous Surfaces

Li Yang,<sup>1</sup> Zihua Zhu,<sup>2\*</sup> Xiao-Ying Yu,<sup>3\*</sup> Theva Thevuthasanand<sup>2</sup>, James P. Cowin<sup>1,4</sup>

*1. Chemical and Materials Sciences Division, Pacific Northwest National Laboratory, Richland, WA 99354*

*2. W. R. Wiley Environmental Molecular Science Laboratory, Pacific Northwest National Laboratory, Richland, WA 99354*

*3. Atmospheric Sciences and Global Climate Change Division, Pacific Northwest National Laboratory, Richland, WA 99354*

*4. Cowin In-Situ Science, L. L. C., Richland, WA 99354 (currently)*

---

\* Email: [zihua.zhu@pnnl.gov](mailto:zihua.zhu@pnnl.gov); Phone: 1-509-371-6240; Fax: 1-509-371-7866

\* Email: [xiaoying.yu@pnnl.gov](mailto:xiaoying.yu@pnnl.gov); Phone: 1-509-372-4524; Fax: 1-509-372-6168

## Supplemental Materials

**Figure S-1** illustrates the supported experimental data and linear least-squares fit to determine the detection limit for glycerol solutions.

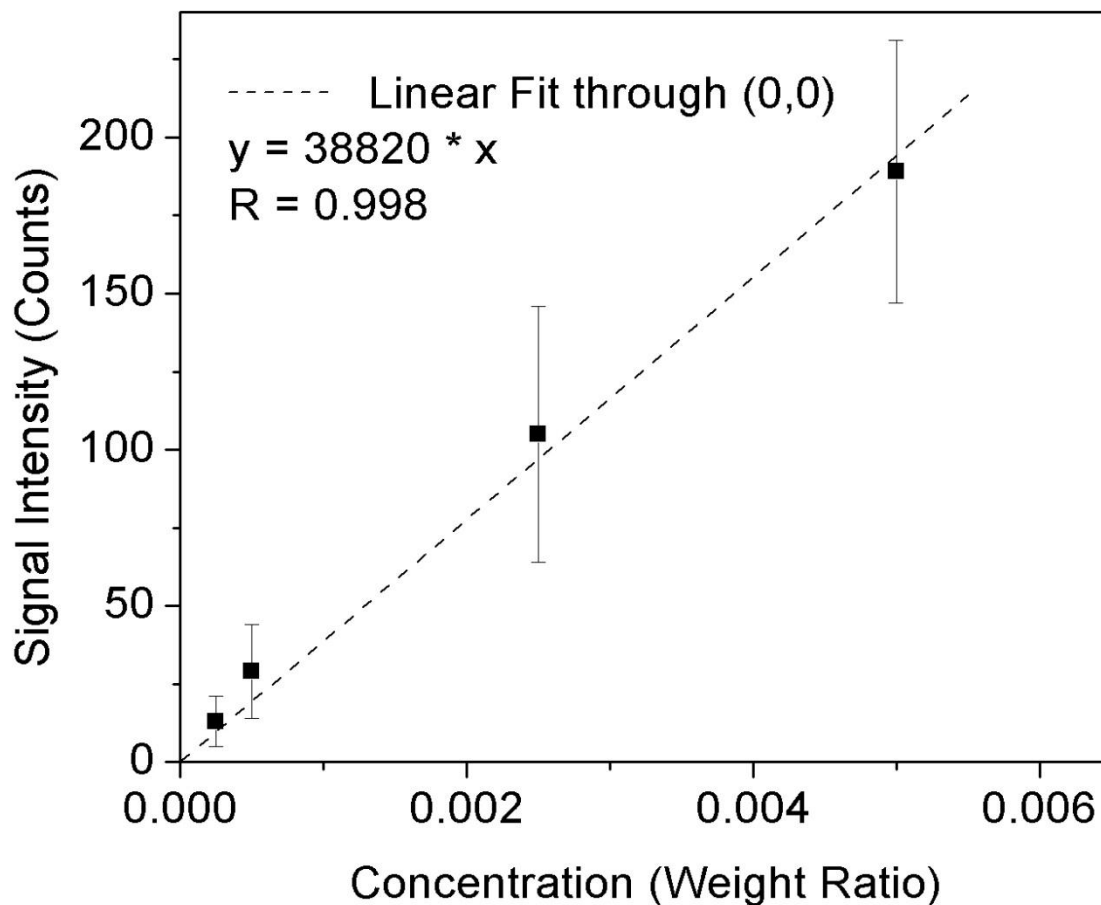

**Figure S-1:** The relationship between molecular signal intensities and concentrations of glycerol. Four concentrations are 0.5%, 0.25%, 0.05%, 0.025%. The dash line is a linear least-squares fit passing the zero point.
